# Supplementary material for: Control of Partial Coalescence of Self-Assembled Metal Nano-Particles across Lyotropic Liquid Crystals Templates towards Long Range Meso-Porous Metal Frameworks Design
Source: MDPI journal article supplement (doi:10.3390/nano5041766), 2015-10-26
Supplement: s1 [file s1]

# Supporting Information

## S1. SAXS Details and Theory

As seen in Equation (S1), the scattering vector ( $q$ ,  $\text{\AA}^{-1}$ ) is determined from the beam wavelength characteristics ( $\lambda$ ,  $\text{cm}^{-1}$ ) and the scattering angle ( $\theta$ , rad) formed from X-ray arrays scattered from features present across the sample:

$$q = \frac{4\pi}{\lambda} \sin\left(\frac{\theta}{2}\right) \tag{S1}$$

The d-spacing is defined in Equation (S2):

$$n\lambda = 2d \sin\theta \tag{S2}$$

where  $n$  is an integer,  $\lambda$  is the wavelength of the incident beam,  $d$  is the spacing between the planes in the atomic lattice and  $\theta$  is the angle between the incident ray and the scattering planes. At small angles (below  $5^\circ$ ), the d-spacing may be evaluated as the inverse of the scattering vector  $q$  (Equation (S3)):

$$d = \frac{2\pi}{q} \tag{S3}$$

## S2. Figures and Tables

**Table S1.** Examples of the values of the ratios  $q_i/q^*$  for the main crystalline phases encountered for block-copolymer (BCP); determination of the crystalline phases from the ratio  $q_i/q^*$  ratios obtained from small angle X ray scattering (SAXS) patterns analysis [26].

| Structure | Face                                    | centred                    | Body                    | Centred                      | lamellar | hexagonal                         |
|-----------|-----------------------------------------|----------------------------|-------------------------|------------------------------|----------|-----------------------------------|
|           | Cubic (FCC)                             |                            | Cubic (BCC)             |                              |          |                                   |
| $q/q^*$   | $\sqrt{3}$ : 2:                         | $\sqrt{8}$ : $\sqrt{11}$ : | 1: $\sqrt{2}$ :         | $\sqrt{3}$ : 2: $\sqrt{5}$ : | 1: 2     | 1: $\sqrt{3}$ : 2: $\sqrt{7}$ : 3 |
|           | $\sqrt{12}$ : $\sqrt{16}$ : $\sqrt{19}$ |                            | $\sqrt{6}$ : $\sqrt{7}$ |                              |          |                                   |

**Table S2.** Structure parameters for F127 alone at different concentrations of BCP in water.

| BCP concentration | Peak number | Scattering vector | Scattering intensity | $\sqrt{q/q^*}$ | Structure analysis |
|-------------------|-------------|-------------------|----------------------|----------------|--------------------|
| wt%               |             | $\text{\AA}^{-1}$ | a.u.                 | -              |                    |
| 5                 | $q^*$       | 0.01782           | 750.66               | 1              | lamellar           |
|                   | 2           | 0.03429           | 20.3099              | 3.702708907    |                    |
| 10                | $q^*$       | 0.017396          | 1862.22              | 1              | lamellar           |
|                   | 2           | 0.03429           | 30.2394              | 3.885403904    |                    |
|                   | 3           | 0.0511889         | 9.67073              | 8.658702061    |                    |
| 20                | $q^*$       | 0.017395          | 3374.26              | 1              | FCC                |
|                   | 2           | 0.0342925         | 57.8131              | 3.88641728     |                    |
|                   | 3           | 0.0501951         | 11.703               | 8.326716556    |                    |
|                   | 4           | 0.0690776         | 8.5966               | 15.76977926    |                    |
| 30                | $q^*$       | 0.0174            | 3760.96              | 1              | FCC                |
|                   | 2           | 0.03429           | 43.5455              | 3.883617717    |                    |
|                   | 3           | 0.05218           | 10.4606              | 8.993104769    |                    |
|                   | 4           | 0.06808           | 8.30209              | 15.30878055    |                    |
| 40                | $q^*$       | 0.017395          | 3040.968             | 1              | hexagonal          |
|                   | 2           | 0.0342925         | 15.8489              | 3.88641728     |                    |
|                   | 3           | 0.0541705         | 8.75206              | 9.697880364    |                    |
| 50                | $q^*$       | 0.017395          | 3873.95              | 1              | FCC                |
|                   | 2           | 0.0332986         | 74.7347              | 3.664401758    |                    |
|                   | 3           | 0.0492012         | 15.0265              | 8.000230947    |                    |
|                   | 4           | 0.0660963         | 9.6786               | 14.43794661    |                    |
| 60                | $q^*$       | 0.01693           | 3006.16              | 1              | hexagonal          |
|                   | 2           | 0.0332986         | 58.6658              | 3.868459307    |                    |
|                   | 3           | 0.0501951         | 12.2531              | 8.790401895    |                    |
|                   | 4           | 0.0660963         | 8.95361              | 15.24194469    |                    |
| 70                | $q^*$       | 0.015484          | 3215.5               | 1              | hexagonal          |
|                   | 2           | 0.0313107         | 58.329               | 4.089019944    |                    |
|                   | 3           | 0.04224           | 16.4431              | 7.441859968    |                    |
|                   | 4           | 0.0501951         | 12.4329              | 10.50887732    |                    |
|                   | 5           | 0.0680838         | 8.77771              | 19.3339793     |                    |
| 85                | $q^*$       | 0.01649           | 4643.99              | 1              | FCC                |
|                   | 2           | 0.032046          | 82.5937              | 3.776646581    |                    |
|                   | 3           | 0.0501951         | 17.017               | 9.265766172    |                    |
| 100               | $q^*$       | 0.017395          | 942.631              | 1              | hexagonal          |
|                   | 2           | 0.0342925         | 48.6684              | 3.88641728     |                    |
|                   | 3           | 0.0511889         | 24.5871              | 8.659697629    |                    |

**Table S3.** Structure parameters for F127 and the Ag nano-particles (NPs) at different concentrations of BCP in water.

| BCP concentration | Peak number | Scattering vector | Scattering intensity | $\sqrt{q/q^*}$ | Structure analysis |
|-------------------|-------------|-------------------|----------------------|----------------|--------------------|
| wt%               |             | $\text{\AA}^{-1}$ | a.u.                 | -              |                    |
| <b>5</b>          | $q^*$       | 0.01797           | 410.849              | 1              | BCC                |
|                   | 2           | 0.03529           | 19.0263              | 3.856622783    |                    |
|                   | 3           | 0.04423           | 11.5553              | 6.058117948    |                    |
| <b>10</b>         | $q^*$       | 0.01781           | 378.728              | 1              | hexagonal          |
|                   | 2           | 0.03429           | 20.0448              | 3.706868086    |                    |
|                   | 3           | 0.05318           | 9.55342              | 8.915974692    |                    |
| <b>20</b>         | $q^*$       | 0.01736           | 2969.43              | 1              | hexagonal          |
|                   | 2           | 0.03429           | 50.5903              | 3.901535191    |                    |
|                   | 3           | 0.0502            | 12.381               | 8.361958207    |                    |
|                   | 4           | 0.06808           | 8.78721              | 15.3794092     |                    |
| <b>30</b>         | $q^*$       | 0.01713           | 6082.49              | 1              | hexagonal          |
|                   | 2           | 0.03429           | 94.4827              | 4.007008321    |                    |
|                   | 3           | 0.05119           | 16.2395              | 8.930083776    |                    |
|                   | 4           | 0.06709           | 10.6874              | 15.33913458    |                    |
| <b>40</b>         | $q^*$       | 0.01753           | 2071.66              | 1              | FCC                |
|                   | 2           | 0.03429           | 46.3521              | 3.826230577    |                    |
|                   | 3           | 0.05119           | 11.4321              | 8.527199562    |                    |
|                   | 4           | 0.06808           | 8.62888              | 15.08256696    |                    |
| <b>50</b>         | $q^*$       | 0.0167            | 9648.42              | 1              | FCC                |
|                   | 2           | 0.0333            | 213.901              | 3.976083761    |                    |
|                   | 3           | 0.04721           | 41.2285              | 7.991624296    |                    |
|                   | 4           | 0.0661            | 17.5666              | 15.66642762    |                    |
| <b>60</b>         | $q^*$       | 0.01716           | 2571.18              | 1              | hexagonal          |
|                   | 2           | 0.03429           | 63.2894              | 3.993010049    |                    |
|                   | 3           | 0.05318           | 14.4249              | 9.604219984    |                    |
|                   | 4           | 0.06908           | 10.2278              | 16.20578567    |                    |
| <b>70</b>         | $q^*$       | 0.014477          | 3713.45              | 1              | lamellar           |
|                   | 2           | 0.02932           | 104.252              | 4.101765077    |                    |
|                   | 3           | 0.05616           | 14.4972              | 15.04863295    |                    |
| <b>85</b>         | $q^*$       | 0.0164            | 5219.64              | 1              | hexagonal          |
|                   | 2           | 0.033299          | 126.767              | 4.122534064    |                    |
|                   | 3           | 0.04324           | 39.0198              | 6.951582391    |                    |
| <b>100</b>        | $q^*$       | 0.0174            | 3087.21              | 1              | lamellar           |
|                   | 2           | 0.03529           | 102.783              | 4.113436716    |                    |
|                   | 3           | 0.05815           | 29.7025              | 11.16865669    |                    |

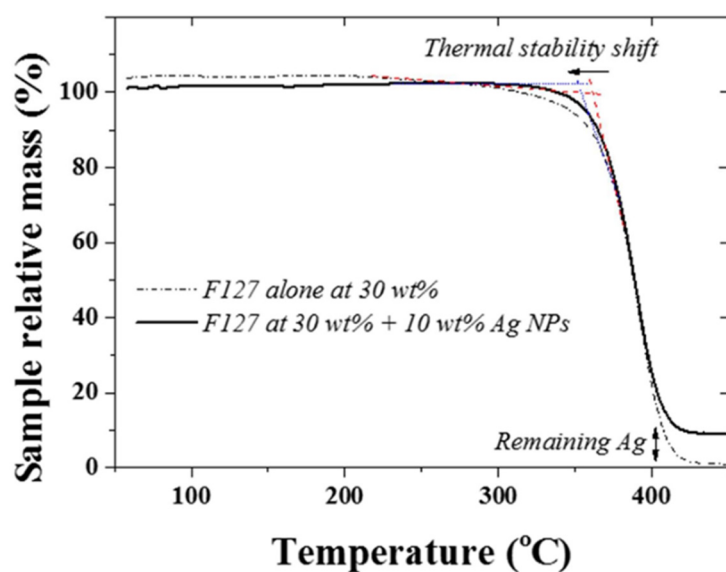

**Figure S1.** Thermo gravimetric analysis (TGA) of F127 and F127 with 30 wt % silver NPs.

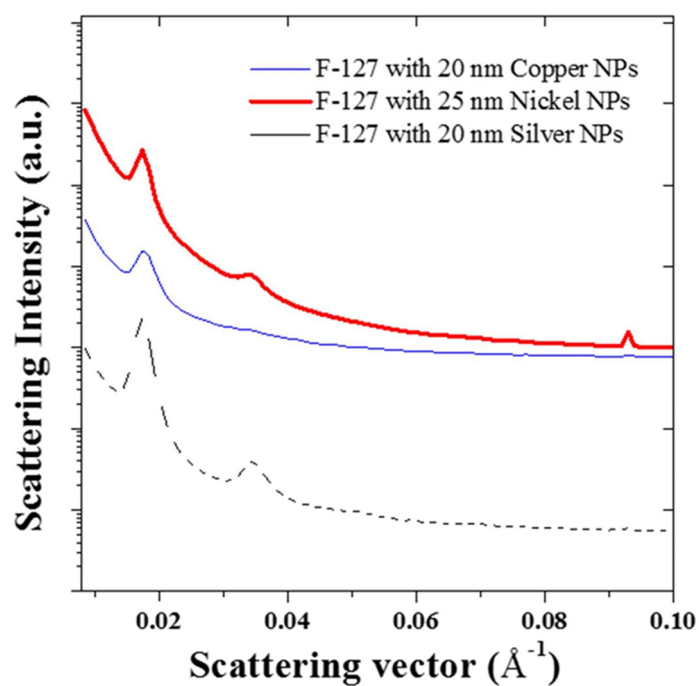

**Figure S2.** Impact of different metal NP (silver, copper and nickel) of similar size on the crystalline structure of the lyotropic liquid crystals (LLC) micelles.



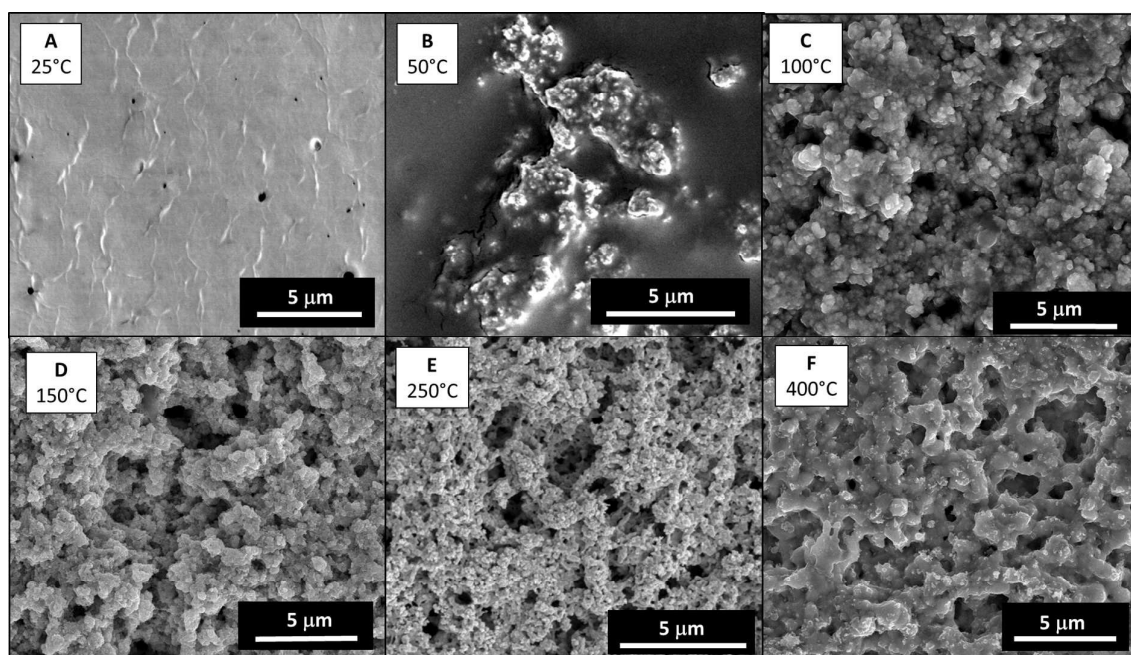

**Figure S3.** Impact of the temperature on the final morphology and removal of the LLC template. The temperatures used included (A) 25 °C, (B) 50 °C, (C) 100 °C, (D) 150 °C, (E) 250 °C and (F) 400 °C for fixed durations and conditions as described in the experimental section.

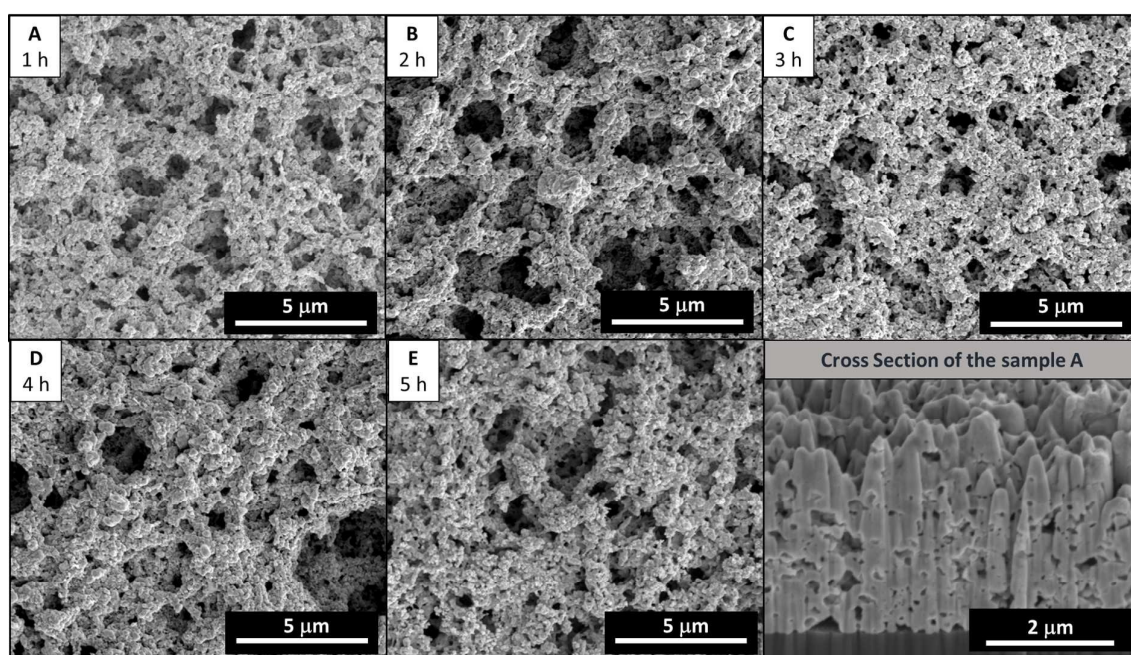

**Figure S4.** Impact of the annealing duration at 250 °C on the morphology of the structure for (A) 1 h, (B) 2 h, (C) 3 h, (D) 4 h and (E) 5 h. (F) is a representative cross section of (A). Tests performed for conditions presented in the experimental section.

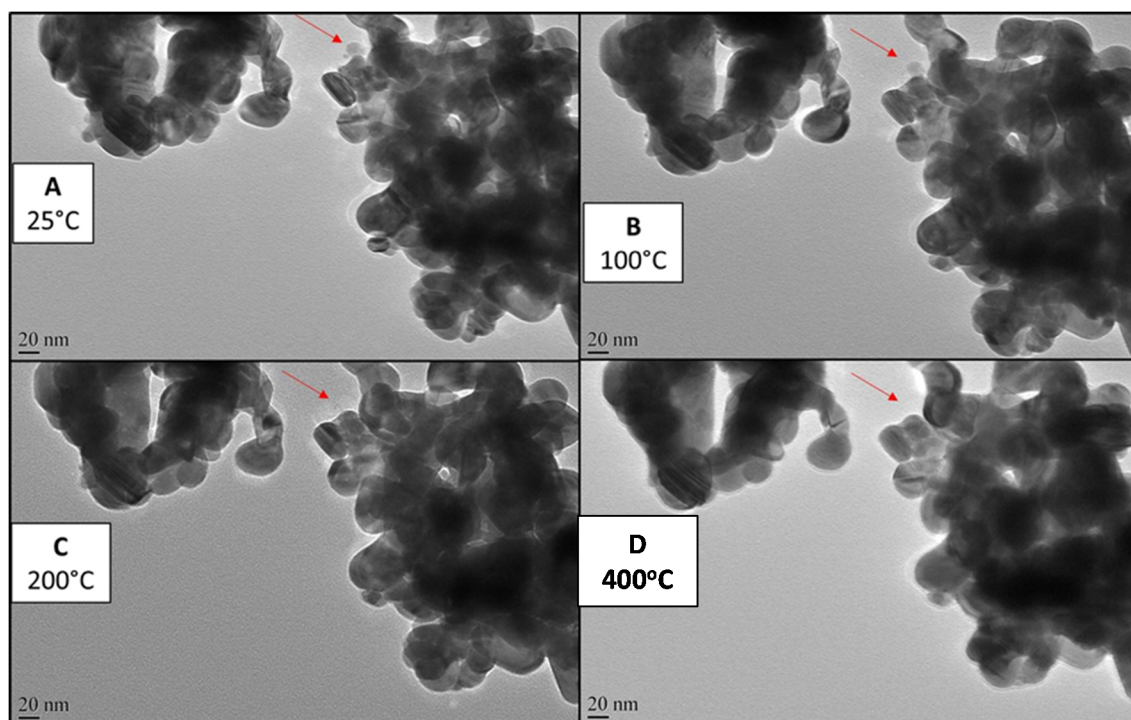

**Figure S5.** *In-situ* transmission electron micrograph (TEM) coalescence experiments performed with a for a 0.5 wt % of NPs in ethanol mixture at (A) 25 °C, (B) 100 °C, (C) 200 °C and (D) 400 °C.

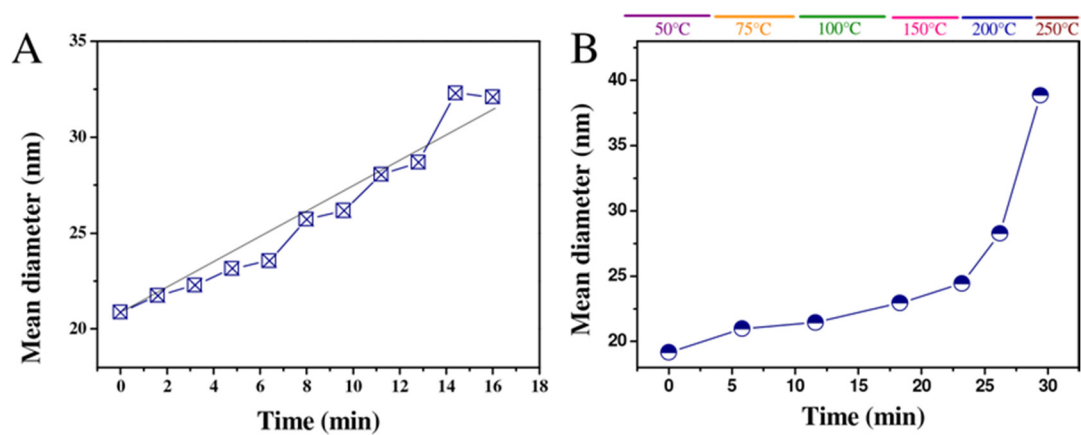

**Figure S6.** SAXS modelling for the average scatterer dimension as a function of (A) time of annealing in air at 50 °C; and (B) temperature of annealing over time.



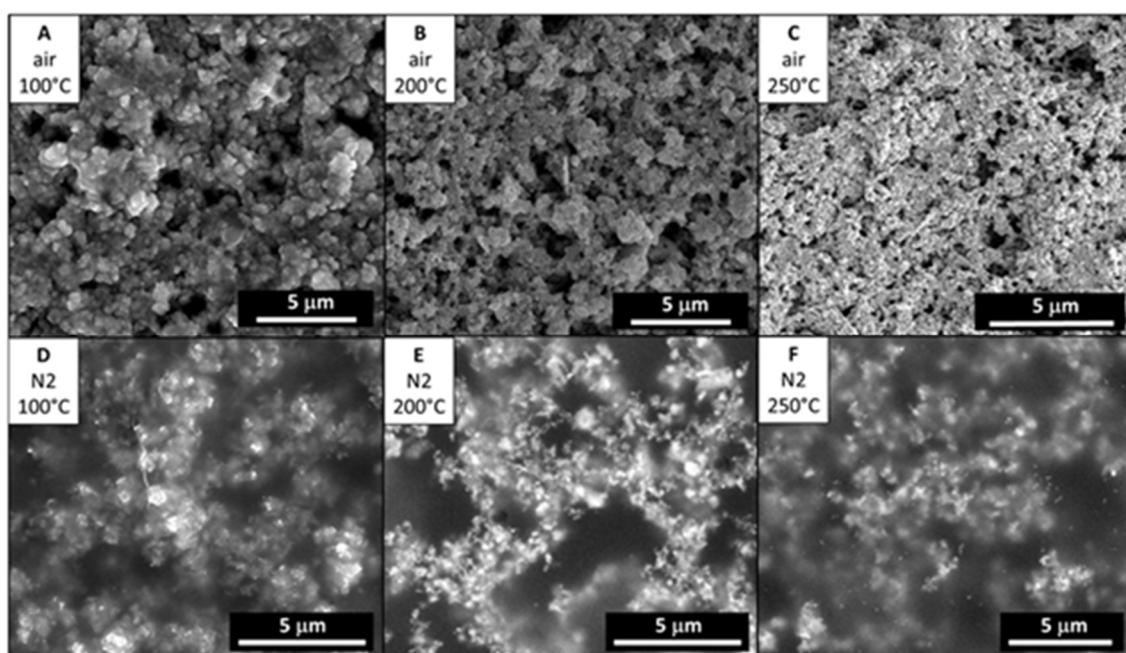

**Figure S7.** Impact of the annealing atmosphere on the LLC removal and pore formation in air and N<sub>2</sub>.

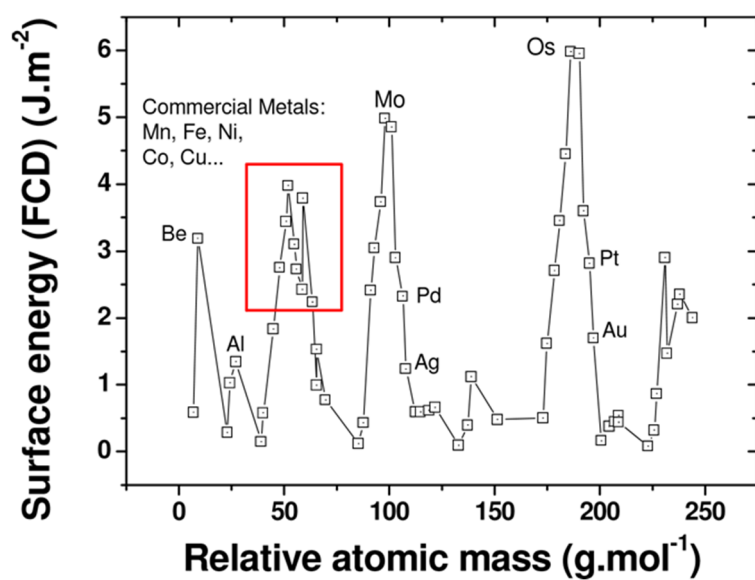

**Figure S8.** Surface energies of metal surfaces computed by full charge density model (FCD) as a function of the materials density [34].

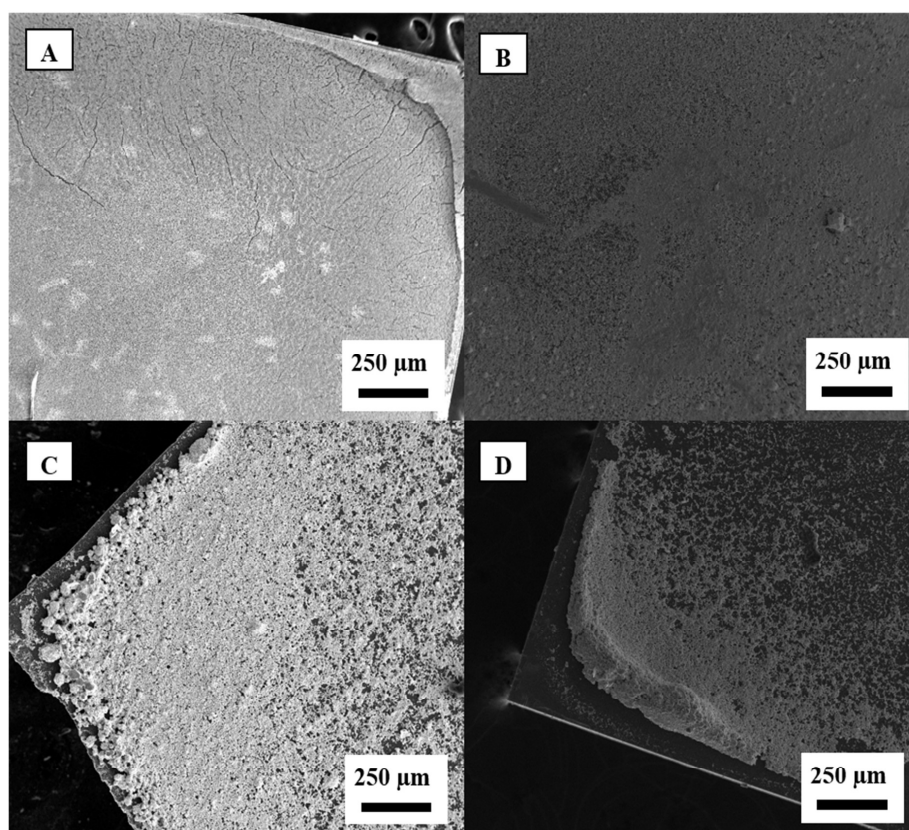

**Figure S9.** Evidence of particle ejection during spin coating for the same spin coating conditions presented in Figure 7 at (A) 0 rpm, (B) 100 rpm, (C) 1000 rpm, and (D) 2000 rpm.
